# Supplementary material
Source: ML conference proceedings conference paper supplement (https://openaccess.thecvf.com/content/CVPR2026/html/Yue_SpiralDiff_Spiral_Diffusion_CVPR_2026_paper.html)
Supplement: Supplementary file 1 [file Yue_SpiralDiff_Spiral_Diffusion_CVPR_2026_supplemental.pdf]

# SpiralDiff: Spiral Diffusion with LoRA for RGB-to-RAW Conversion Across Cameras

## Supplementary Material

In this supplementary material, we present more implementation details of SpiralDiff and additional experiment results. First, we introduce the derivation of forward and backward processes and the overall training and sampling pipelines in Sec. A. Then we present additional experiment results in Sec. B.

### A. Additional Details of SpiralDiff

**Derivation of Eq. 6** As discussed in Sec. 3.2, we propose a signal-dependent noise weighting strategy parameterized by a sequence of weight maps  $\mathbf{w}_{t=1}^T$ , defined as

$$\mathbf{w}_t = \mathbf{x}_0 + \eta_t \mathbf{e}_0. \quad (10)$$

Here,  $\eta_t$  increases monotonically with  $t$ , with boundary conditions  $\eta_0 = 0$  and  $\eta_T \rightarrow 1$ . The forward transition distribution of SpiralDiff is given by:

$$q(\mathbf{x}_t | \mathbf{x}_{t-1}, \mathbf{x}_0, \mathbf{y}_0) = \mathcal{N}(\mathbf{x}_t; \mathbf{x}_{t-1} + \alpha_t \mathbf{e}_0, \kappa^2(\eta_t \mathbf{w}_t^2 - \eta_{t-1} \mathbf{w}_{t-1}^2) \mathbf{I}), \quad (11)$$

where  $\mathbf{w}_t^2$  denotes the element-wise square of  $\mathbf{w}_t$  for each pixel  $p$  and  $\mathbf{I}$  is the identity matrix. Following the reparameterization of the forward process,  $\mathbf{x}_t$  can be expressed as

$$\begin{aligned} \mathbf{x}_t &= \mathbf{x}_0 + \sum_{i=1}^t (\mathbf{x}_i - \mathbf{x}_{i-1}) \\ &= \mathbf{x}_0 + \sum_{i=1}^t \left( \alpha_i (\mathbf{y}_0 - \mathbf{x}_0) + \kappa \sqrt{\eta_i \mathbf{w}_i^2 - \eta_{i-1} \mathbf{w}_{i-1}^2} \boldsymbol{\epsilon}_i \right) \\ &= \mathbf{x}_0 + \eta_t (\mathbf{y}_0 - \mathbf{x}_0) + \kappa \sqrt{\eta_t} \mathbf{w}_t \boldsymbol{\epsilon}_t, \end{aligned} \quad (12)$$

where  $\boldsymbol{\epsilon}_i \sim \mathcal{N}(\mathbf{0}, \mathbf{I})$  are i.i.d. Gaussian noise variables, and  $\boldsymbol{\epsilon}_t$  denotes the aggregated noise up to step  $t$ . This leads to the marginal distribution:

$$q(\mathbf{x}_t | \mathbf{x}_0, \mathbf{y}_0) = \mathcal{N}(\mathbf{x}_t; \mathbf{x}_0 + \eta_t \mathbf{e}_0, \kappa^2 \eta_t \mathbf{w}_t^2 \mathbf{I}). \quad (13)$$

**Derivation of Eq. 7** According to Bayes's theorem, the reverse transition distribution can be written as

$$\begin{aligned} q(\mathbf{x}_{t-1} | \mathbf{x}_t, \mathbf{x}_0, \mathbf{y}_0) &= \frac{q(\mathbf{x}_t | \mathbf{x}_{t-1}, \mathbf{x}_0, \mathbf{y}_0) q(\mathbf{x}_{t-1} | \mathbf{x}_0, \mathbf{y}_0)}{q(\mathbf{x}_t | \mathbf{x}_0, \mathbf{y}_0)} \\ &\propto q(\mathbf{x}_t | \mathbf{x}_{t-1}, \mathbf{x}_0, \mathbf{y}_0) q(\mathbf{x}_{t-1} | \mathbf{x}_0, \mathbf{y}_0). \end{aligned} \quad (14)$$

Incorporating Eq.11, Eq.13 and Eq.14, we consider the distribution at each pixel  $p$  as:

$$q(x_{t-1}^p | x_t^p, x_0^p, y_0^p) \propto q(x_t^p | x_{t-1}^p, x_0^p, y_0^p) q(x_{t-1}^p | x_0^p, y_0^p) \quad (15)$$

The two terms are:

$$q(x_t^p | x_{t-1}^p, x_0^p, y_0^p) = \mathcal{N}(x_t^p; x_{t-1}^p + \alpha_t e_0^p, \kappa^2 (\eta_t (w_t^p)^2 - \eta_{t-1} (w_{t-1}^p)^2)) \quad (16)$$

$$q(x_{t-1}^p | x_0^p, y_0^p) = \mathcal{N}(x_{t-1}^p; x_0^p + \eta_{t-1} e_0^p, \kappa^2 \eta_{t-1} (w_{t-1}^p)^2) \quad (17)$$

The exponent of the posterior  $q(x_{t-1}^p | x_t^p, x_0^p, y_0^p)$  takes the following quadratic form:

$$\begin{aligned}
& -\frac{(x_t^p - x_{t-1}^p - \alpha_t e_0^p)^2}{2\kappa^2(\eta_t(w_t^p)^2 - \eta_{t-1}(w_{t-1}^p)^2)} - \frac{(x_{t-1}^p - x_0^p - \eta_{t-1}e_0^p)^2}{2\kappa^2\eta_{t-1}(w_{t-1}^p)^2} \\
& = -\frac{1}{2} \left[ \frac{1}{\kappa^2(\eta_t(w_t^p)^2 - \eta_{t-1}(w_{t-1}^p)^2)} + \frac{1}{\kappa^2\eta_{t-1}(w_{t-1}^p)^2} \right] (x_{t-1}^p)^2 \\
& \quad + \left[ \frac{x_t^p - \alpha_t e_0^p}{\kappa^2(\eta_t(w_t^p)^2 - \eta_{t-1}(w_{t-1}^p)^2)} + \frac{x_0^p + \eta_{t-1}e_0^p}{\kappa^2\eta_{t-1}(w_{t-1}^p)^2} \right] x_{t-1}^p + \text{const} \\
& = -\frac{(x_{t-1}^p - \mu_{t-1}^p)^2}{2(\sigma_{t-1}^p)^2} + \text{const},
\end{aligned} \tag{18}$$

where  $\mu_{t-1}^p$  and  $\sigma_{t-1}^p$  denote the mean and standard deviation of the posterior at pixel  $p$ , and  $\text{const}$  collects terms independent of  $x_{t-1}^p$ . The closed-form expressions for the posterior parameters are:

$$\begin{aligned}
\mu_{t-1}^p &= \gamma_t^p (x_t^p - \alpha_t e_0^p) + (1 - \gamma_t^p)(x_0^p + \eta_{t-1}e_0^p) \\
(\sigma_{t-1}^p)^2 &= \kappa^2 \gamma_t^p (\eta_t(w_t^p)^2 - \eta_{t-1}(w_{t-1}^p)^2) \\
\gamma_t^p &= \frac{\eta_{t-1}(w_{t-1}^p)^2}{\eta_t(w_t^p)^2}
\end{aligned} \tag{19}$$

Therefore, the reverse transition distribution is given by:

$$\begin{aligned}
q(\mathbf{x}_{t-1} | \mathbf{x}_t, \mathbf{x}_0, \mathbf{y}_0) &= \prod_p q(x_{t-1}^p | x_t^p, x_0^p, y_0^p) \\
&= \mathcal{N}(\mathbf{x}_{t-1}; \boldsymbol{\mu}_{t-1}, \boldsymbol{\Sigma}_{t-1}),
\end{aligned} \tag{20}$$

The mean and covariance are:

$$\begin{aligned}
\boldsymbol{\mu}_{t-1} &= \boldsymbol{\gamma}_t \odot (\mathbf{x}_t - \alpha_t \mathbf{e}_0) + (\mathbf{1} - \boldsymbol{\gamma}_t) \odot (\mathbf{x}_0 + \eta_{t-1} \mathbf{e}_0), \\
\boldsymbol{\Sigma}_{t-1} &= \kappa^2 \boldsymbol{\gamma}_t \odot (\eta_t \mathbf{w}_t^2 - \eta_{t-1} \mathbf{w}_{t-1}^2), \\
\boldsymbol{\gamma}_t &= \frac{\eta_{t-1} \mathbf{w}_{t-1}^2}{\eta_t \mathbf{w}_t^2},
\end{aligned} \tag{21}$$

where  $\odot$  denotes element-wise multiplication and division is performed element-wise.

**Details of  $\mathbf{w}_t$**  Since  $\mathbf{x}_0$  and  $\mathbf{y}_0$  lie in the range  $[-1, 1]$ , the resulting  $\mathbf{w}_t$  also falls within this interval. In practice, we normalize  $\mathbf{w}_t$  to  $[0, 1]$  by a simple range mapping, and then add a small bias term  $b \in (0, 1)$ :

$$\hat{\mathbf{w}}_t = b + (1 - b)\mathbf{w}_t \tag{22}$$

This guarantees that  $\hat{\mathbf{w}}_t$  is strictly bounded away from zero, where  $b$  acts as a lower bound on the noise level and prevents numerical instability when computing  $\boldsymbol{\gamma}_t$ . Consequently,  $\hat{\mathbf{w}}_t \in [b, 1]$ . We set  $b = 0.1$  as the default value.

**Training and sampling pipelines** We present the training and sampling pipelines in Alg. 1 and Alg. 2. During training, we randomly sample a triplet consisting of a RAW image  $\mathbf{x}_0$ , its corresponding RGB image  $\mathbf{y}_0$ , and the associated camera label  $c$ . Based on  $\hat{\mathbf{w}}_t$  and  $\mathbf{e}_0$ , the noisy image  $\mathbf{x}_t$  is sampled according to Eq. 13. The denoising model is optimized to predict  $\mathbf{x}_0$ , denoted as  $\hat{\mathbf{x}}_{0|t} = f_\theta(\mathbf{x}_t, \mathbf{y}_0, t, c)$ . During sampling,  $\hat{\mathbf{w}}_t$  and  $\hat{\mathbf{e}}_0$  are updated according to the model output  $\hat{\mathbf{x}}_{0|t}$ , then  $\mathbf{x}_{t-1}$  is sampled by Eq. 20. By iteratively denoising and sampling, the clean image  $\mathbf{x}_0$  is obtained.

**Loss function** We follow the same loss function as that in RAW-Diffusion [33], which combines the MSE, L1 and log-L1 loss. The overall loss is formulated as:

$$\begin{aligned}
\mathcal{L} &= \mathcal{L}_{\text{MSE}} + \mathcal{L}_{\text{L1}} + \mathcal{L}_{\text{logL1}} \\
&= \sum_t \left( \|\hat{\mathbf{x}}_{0|t} - \mathbf{x}_0\|_2^2 + \|\hat{\mathbf{x}}_{0|t} - \mathbf{x}_0\|_1 + \|\log(\hat{\mathbf{x}}_{0|t} + \epsilon) - \log(\mathbf{x}_0 + \epsilon)\|_1 \right),
\end{aligned} \tag{23}$$

where  $\epsilon$  is a minimal constant.

---

**Algorithm 1: Training**

---

**Input:** RAW image  $\mathbf{x}_0$ , RGB image  $\mathbf{y}_0$ , camera label  $c$

**while not converged do**

- Sample  $t \sim \mathcal{U}(\{1, \dots, T\})$ ;
- Sample  $\epsilon \sim \mathcal{N}(\mathbf{0}, \mathbf{I})$ ;
- $\mathbf{e}_0 = \mathbf{y}_0 - \mathbf{x}_0$ ;
- $\mathbf{w}_t = \mathbf{x}_0 + \eta_t \mathbf{e}_0$ ;
- $\hat{\mathbf{w}}_t = b + (1 - b)\mathbf{w}_t$ ;
- $\mathbf{x}_t = \mathbf{x}_0 + \eta_t \mathbf{e}_0 + \kappa \sqrt{\eta_t} \hat{\mathbf{w}}_t \epsilon$ ;
- Take gradient step on  $\nabla_{\theta} \mathcal{L}(\mathbf{x}_0, f_{\theta}(\mathbf{x}_t, \mathbf{y}_0, t, c))$ ;

**return**  $\theta$

---



---

**Algorithm 2: Sampling**

---

**Input:** RGB image  $\mathbf{y}_0$ , camera label  $c$ , denoising model  $f_{\theta}$

Sample  $\epsilon \sim \mathcal{N}(\mathbf{0}, \mathbf{I})$ ;

$\hat{\mathbf{w}}_T = b + (1 - b)\mathbf{y}_0$ ;

$\mathbf{x}_T = \mathbf{y}_0 + \kappa \sqrt{\eta_T} \hat{\mathbf{w}}_T \epsilon$ ;

**for**  $t = T, \dots, 1$  **do**

- Sample  $\epsilon \sim \mathcal{N}(\mathbf{0}, \mathbf{I})$ ;
- $\hat{\mathbf{x}}_{0|t} = f_{\theta}(\mathbf{x}_t, \mathbf{y}_0, t, c)$ ;
- $\hat{\mathbf{e}}_{0|t} = \mathbf{y}_0 - \hat{\mathbf{x}}_{0|t}$ ;
- $\mathbf{w}_t = \hat{\mathbf{x}}_{0|t} + \eta_t \hat{\mathbf{e}}_{0|t}$ ;
- $\mathbf{w}_{t-1} = \hat{\mathbf{x}}_{0|t} + \eta_{t-1} \hat{\mathbf{e}}_{0|t}$ ;
- $\hat{\mathbf{w}}_t = b + (1 - b)\mathbf{w}_t$ ;
- $\hat{\mathbf{w}}_{t-1} = b + (1 - b)\mathbf{w}_{t-1}$ ;
- $\gamma_t = \frac{\eta_{t-1} \hat{\mathbf{w}}_{t-1}^2}{\eta_t \hat{\mathbf{w}}_t^2}$ ;
- $\boldsymbol{\mu}_{t-1} = \gamma_t (\mathbf{x}_t - \alpha_t \hat{\mathbf{e}}_{0|t}) + (1 - \gamma_t) (\hat{\mathbf{x}}_{0|t} + \eta_{t-1} \hat{\mathbf{e}}_{0|t})$ ;
- $\boldsymbol{\Sigma}_{t-1} = \kappa^2 \gamma_t (\eta_t \hat{\mathbf{w}}_t^2 - \eta_{t-1} \hat{\mathbf{w}}_{t-1}^2) \mathbf{I}$ ;
- $\mathbf{x}_{t-1} = \boldsymbol{\mu}_{t-1} + \sqrt{\boldsymbol{\Sigma}_{t-1}} \odot \epsilon$ ;

**return**  $\mathbf{x}_0$

---

## B. Additional Experiments and Results

This section provides additional quantitative evaluations.

Tab. 8 reports the comparison across existing RGB-to-RAW conversion methods on the over-exposed test set, where SpiralDiff consistently outperforms previous approaches.

Table 8. Quantitative comparison results on the over-exposed test set.

| Method             | FiveK Canon  |               | FiveK Nikon  |               | NOD Nikon    |               | NOD Sony     |               |
|--------------------|--------------|---------------|--------------|---------------|--------------|---------------|--------------|---------------|
|                    | PSNR         | SSIM          | PSNR         | SSIM          | PSNR         | SSIM          | PSNR         | SSIM          |
| CycleISP [47]      | 27.75        | 0.9833        | 30.19        | 0.9872        | 35.86        | 0.9957        | 32.52        | 0.9890        |
| InvISP [40]        | 25.15        | 0.9699        | 29.11        | 0.9764        | 36.66        | 0.9905        | 30.85        | 0.9782        |
| ReRAW [3]          | 26.36        | 0.9664        | 27.51        | 0.9520        | 38.56        | 0.9691        | 34.96        | 0.9713        |
| RAW-Diffusion [33] | 30.60        | 0.9739        | 32.95        | 0.9850        | 40.05        | 0.9926        | 35.58        | 0.9792        |
| SpiralDiff         | <b>31.10</b> | <b>0.9856</b> | <b>34.42</b> | <b>0.9908</b> | <b>40.79</b> | <b>0.9973</b> | <b>36.11</b> | <b>0.9919</b> |

Tab. 9 presents the ablation study on the LoRA rank  $r$  used in CamLoRA. We observe that  $r = 8$  achieves the best performance and adopt it as the default setting in all experiments.

Table 9. Ablation study on the LoRA rank  $r$ . We set  $r = 8$  as the default setting for all experiments.

| Rank     | FiveK Canon  |               | FiveK Nikon  |               | NOD Nikon    |               | NOD Sony     |               |
|----------|--------------|---------------|--------------|---------------|--------------|---------------|--------------|---------------|
|          | PSNR         | SSIM          | PSNR         | SSIM          | PSNR         | SSIM          | PSNR         | SSIM          |
| $r = 0$  | 41.99        | 0.9931        | 43.19        | 0.9947        | 52.06        | 0.9987        | 49.52        | 0.9974        |
| $r = 2$  | 42.64        | 0.9928        | 43.52        | 0.9948        | 52.23        | 0.9987        | 49.78        | 0.9977        |
| $r = 4$  | 42.34        | 0.9931        | <b>43.95</b> | 0.9948        | 52.47        | 0.9988        | 49.82        | 0.9977        |
| $r = 8$  | <b>42.46</b> | <b>0.9934</b> | 43.82        | <b>0.9950</b> | <b>52.62</b> | 0.9988        | <b>50.08</b> | 0.9977        |
| $r = 16$ | 42.00        | 0.9932        | 42.82        | 0.9945        | 52.36        | <b>0.9989</b> | 49.60        | <b>0.9978</b> |

Tab. 10 reports the plug-in experiment. RAW-Diffusion is built on the DDPM [17], and we replace this original diffusion

process with our SpiralDiff while leaving the network architecture and training settings unchanged. The improvement, especially on the FiveK dataset with diverse illumination conditions, validates the effectiveness of our signal-dependent noise weighting strategy and shows that it can be integrated into other RGB-to-RAW reconstruction pipelines.

Table 10. *RAW-Diffusion (DDPM)* denotes the original RAW-Diffusion model with its DDPM-based diffusion process, while *RAW-Diffusion (SpiralDiff)* replaces only this diffusion process with our SpiralDiff formulation, keeping the network architecture unchanged.

| Variant                    | FiveK Canon  |               | FiveK Nikon  |               | NOD Nikon    |               | NOD Sony     |               |
|----------------------------|--------------|---------------|--------------|---------------|--------------|---------------|--------------|---------------|
|                            | PSNR         | SSIM          | PSNR         | SSIM          | PSNR         | SSIM          | PSNR         | SSIM          |
| RAW-Diffusion (DDPM)       | 39.96        | 0.9890        | 39.68        | 0.9866        | 50.52        | <b>0.9954</b> | 47.31        | <b>0.9908</b> |
| RAW-Diffusion (SpiralDiff) | <b>41.53</b> | <b>0.9912</b> | <b>42.34</b> | <b>0.9920</b> | <b>50.54</b> | <b>0.9954</b> | <b>47.32</b> | 0.9907        |

We conduct ablation experiments on a real-ISP dataset from the NTIRE’25 RGB-to-RAW conversion track [11], where RGB images are rendered by smartphone ISP pipelines (iPhone and Samsung). Since the official test set is not publicly available, we randomly split the provided training set into 85%/15% for training and evaluation. As shown in Tab. 11, SpiralDiff improves performance on both subsets, and further gains are obtained when integrating CamLoRA.

Table 11. Results on the real-ISP dataset. Models are trained in the *combined* setting.

| Method               | iPhone       |               | Samsung      |               |
|----------------------|--------------|---------------|--------------|---------------|
|                      | PSNR         | SSIM          | PSNR         | SSIM          |
| Baseline             | 30.79        | 0.9040        | 34.84        | 0.9362        |
| SpiralDiff           | 31.56        | 0.9094        | 35.22        | 0.9394        |
| SpiralDiff + CamLoRA | <b>31.57</b> | <b>0.9100</b> | <b>35.96</b> | <b>0.9433</b> |

Table 12. Object detection on NOD.

| Setting | #Real | #Syn | AP   |
|---------|-------|------|------|
| (a)     | 1000  | 0    | 33.7 |
| (b)     | 1000  | 732  | 35.9 |
| (c)     | 1732  | 0    | 36.2 |

We further conduct object detection experiments in a data-rich setting. Tab. 12 reports three training settings: (a) 1000 real RAW images from NOD-train, (b) the same 1000 real images augmented with 732 synthetic RAW images converted from NOD-val RGB using SpiralDiff, and (c) 1732 real RAW images from NOD-train+val. Setting (b) outperforms (a) and approaches (c), indicating that our synthetic RAW data serves as a low-cost substitute for augmenting real RAW data in object detection. We also observe a trade-off when using cross-source synthetic data. When training with all real NOD-RAW together with synthesized CS-RAW, performance decreases on the NOD dataset but increases on the BDD dataset. This also happens when performing the same augmentation in the RGB domain. Overall, in data-rich scenarios, same-source synthetic data improves in-dataset performance, whereas cross-source synthetic data enhances generalization at the cost of degraded in-dataset performance.
